# Supplementary material for: Microengineered cultures containing human hepatic stellate cells and hepatocytes for drug development
Source: Royal Society of Chemistry journal article supplement (doi:10.1039/c7ib00027h), 2017-01-01
Supplement: c7ib00027h1.pdf [file c7ib00027h1.pdf]

## SUPPLEMENTAL INFORMATION

### Microengineered cultures containing human hepatic stellate cells and hepatocytes for drug development

Matthew D. Davidson, David A. Kukla, and Salman R. Khetani

#### LIST OF ABBREVIATIONS

- **Alpha ( $\alpha$ )-SMA:** alpha smooth muscle actin
- **CRP:** C-reactive protein
- **CYP3A4:** Cytochrome P450 3A4
- **DMSO:** dimethylsulfoxide
- **FXR:** farnesoid X receptor
- **GA HSCs:** Growth-arrested hepatic stellate cells
- **GAPDH:** Glyceraldehyde 3-phosphate dehydrogenase
- **GKT:** GKT137831
- **HPRT:** hypoxanthine-guanine phosphoribosyltransferase
- **HSCs:** Hepatic stellate cells (primary human)
- **IL-6:** interleukin-6
- **MPCCs:** Micropatterned co-cultures containing primary human hepatocytes patterned on collagen-coated domains and surrounded by growth-arrested 3T3-J2 fibroblasts
- **MPCC-HSC:** Micropatterned co-cultures containing primary human hepatocytes patterned on collagen-coated domains and surrounded by proliferating hepatic stellate cells.
- **MPCC-GA HSC:** Micropatterned co-cultures containing primary human hepatocytes patterned on collagen-coated domains and surrounded by growth-arrested (mitomycin C treatment) hepatic stellate cells.
- **MPTCs:** Micropatterned tri-cultures containing primary human hepatocytes patterned on collagen-coated domains and surrounded by a mixture of growth-arrested 3T3-J2 fibroblasts and primary human hepatic stellate cells
- **NFE2L2:** Nuclear factor Erythroid 2 like 2 (also known as Nrf2)
- **NOX1:** NADPH-oxidase 1
- **NOX4:** NADPH-oxidase 4
- **OCA:** obeticholic acid
- **PHHs:** Primary human hepatocytes

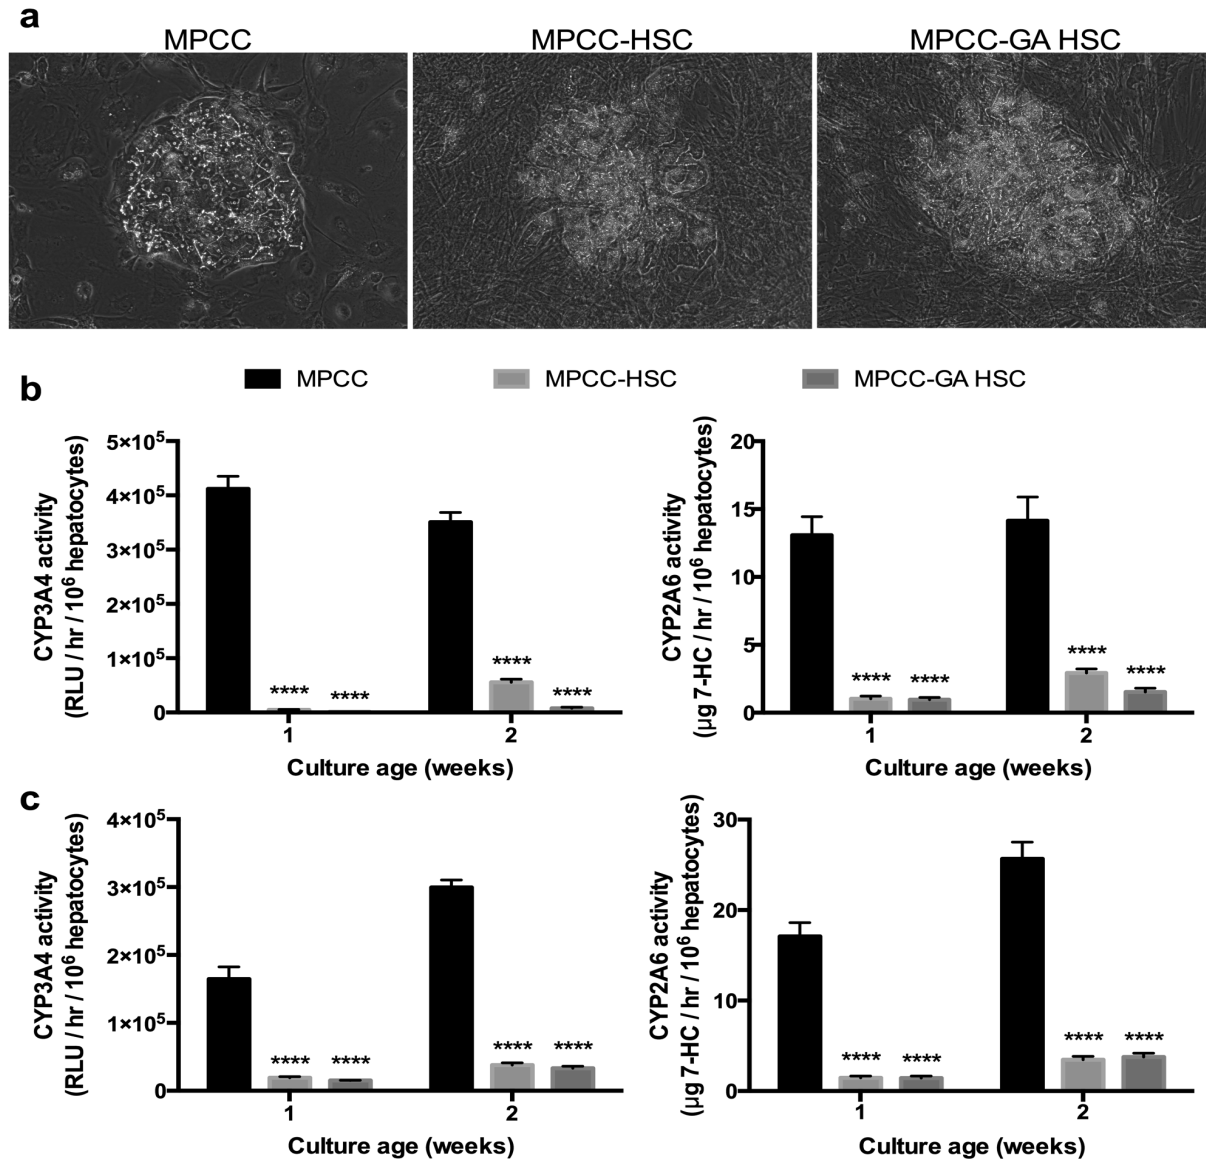

**Supplemental Figure 1. Morphology and functions of PHHs cultured in MPCCs, MPCC-HSC or MPCC-GA HSC. (a)** Phase contrast images of the different models at day 16. **(b)** CYP3A4 (left) and CYP2A6 (right) activities over time. **(c)** Similar data as in panel 'b' except a different PHH donor and different HSC donor were used to create the culture models. Statistical significance is displayed relative to MPCCs at a similar time-point. \*\*\*\*  $p \leq 0.0001$ .

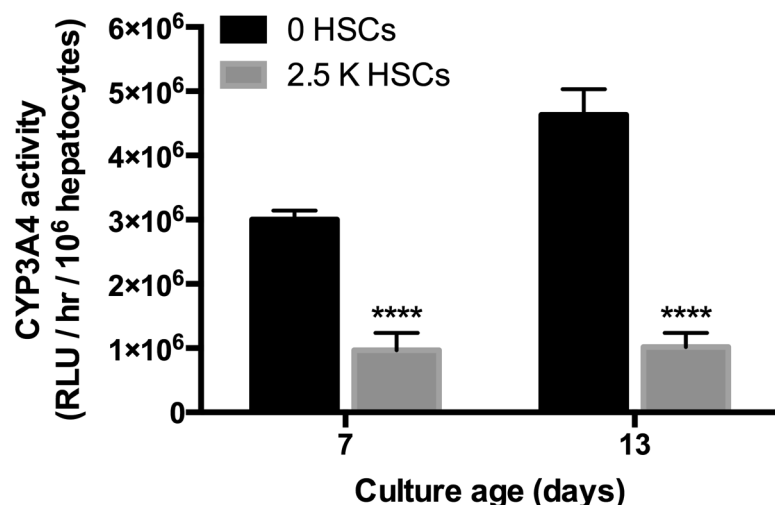

**Supplemental Figure 2. Activated HSCs cause downregulation of CYP3A4 activity in PHHs within MPTCs.** The 2.5K HSCs (proliferative) with 30K PHHs in a 24-well format corresponds to the approximate ratio in the human liver of 1 HSC to 12 PHHs (i.e. 5% HSCs and 60% PHHs of the total number of cells in the liver). Statistical significance is displayed relative to MPCCs at a similar time-point. \*\*\*\*  $p \leq 0.0001$ .

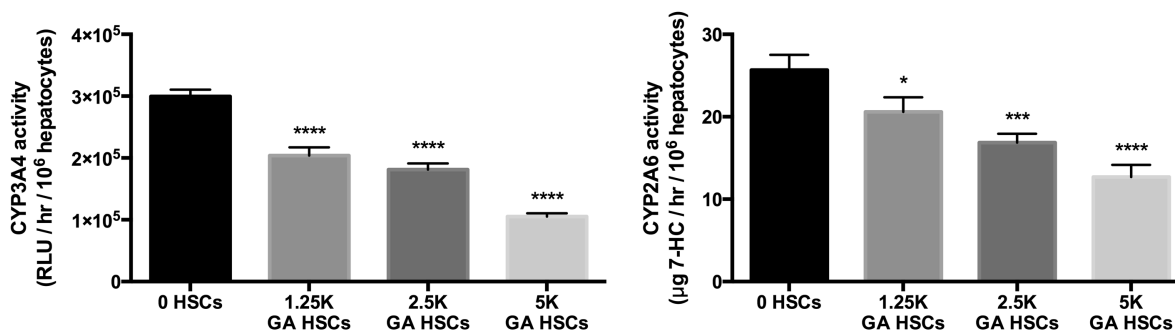

**Supplemental Figure 3. Activated and growth-arrested HSCs cause downregulation of CYP3A4 and CYP2A6 activities in PHHs within MPTCs.** HSCs were growth-arrested via mitomycin C treatment prior to incorporation into MPTCs. Data from day 16 of culture is shown. Statistical significance is displayed relative to MPCCs (0 HSCs). \*  $p \leq 0.05$ , \*\*\*  $p \leq 0.001$ , and \*\*\*\*  $p \leq 0.0001$ .

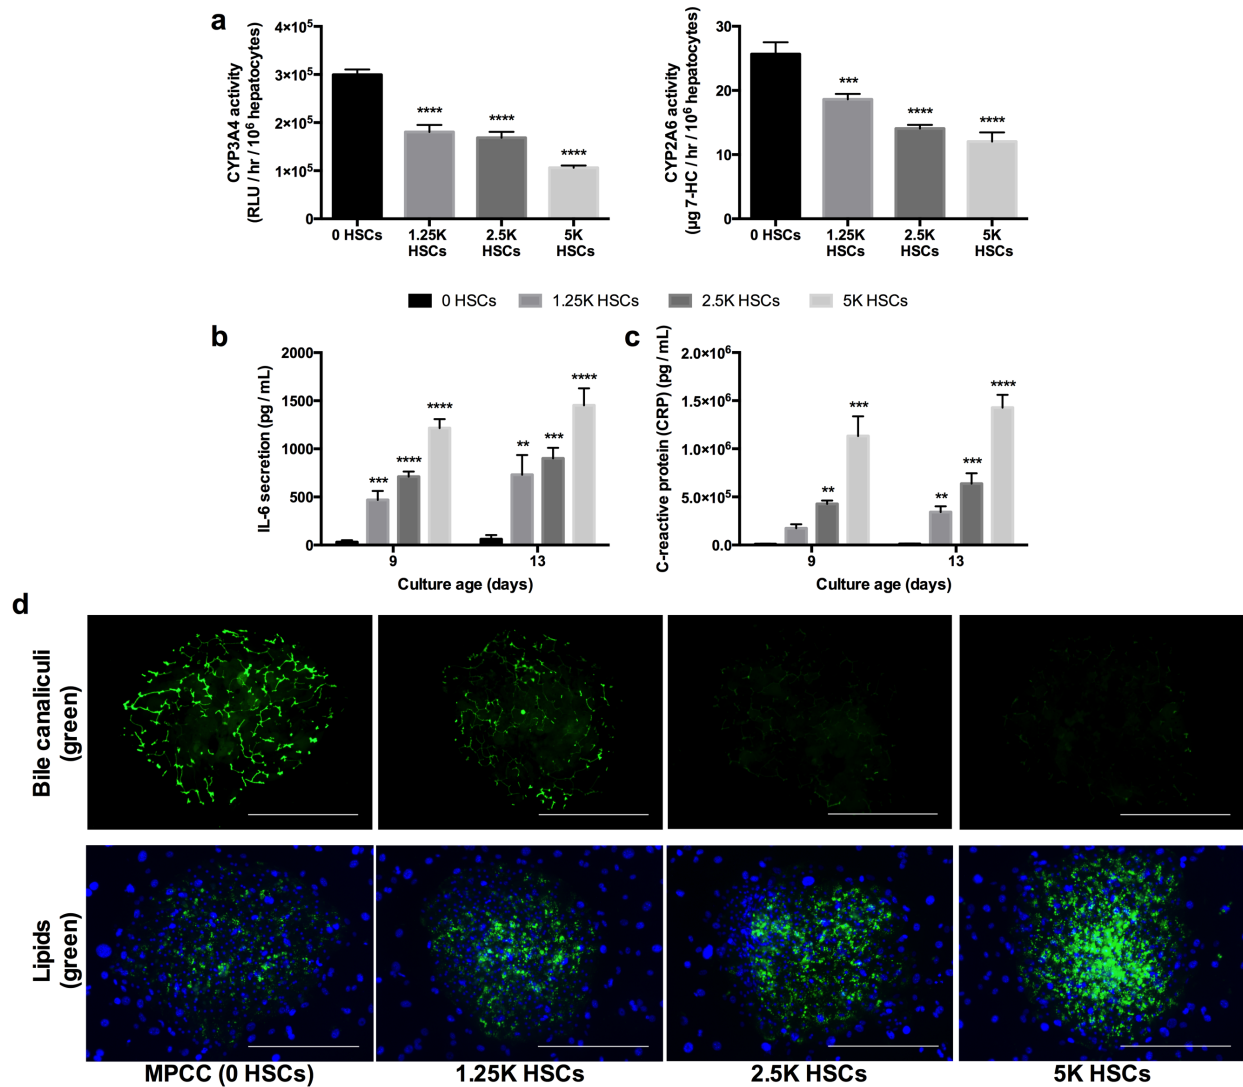

**Supplemental Figure 4. Activated HSCs cause hepatic dysfunctions and increased production of IL-6 and CRP in MPTCs (cultures were created using different PHH and HSC donors than those featured in the main figures). (a) CYP3A4/2A6 activities in 7-day-old MPTCs and MPCCs (0 HSC). IL-6 (b) and CRP (c) levels in MPTCs and MPCCs. (d) Top row:** Images of PHH islands in 15-day-old cultures showing export of (or lack thereof) fluorescent dye into the hepatic bile canaliculi. **Bottom row:** Nile red-stained PHH islands in 15-day-old cultures. Scale bars represent 400  $\mu$ m. Statistical significance is displayed relative to MPCCs (0 HSCs) at the respective time-point. \*\*  $p \leq 0.01$ , \*\*\*  $p \leq 0.001$ , and \*\*\*\*  $p \leq 0.0001$ . Note: Quantification of HSC numbers within MPTCs from these donors is featured in main Figure 3D.



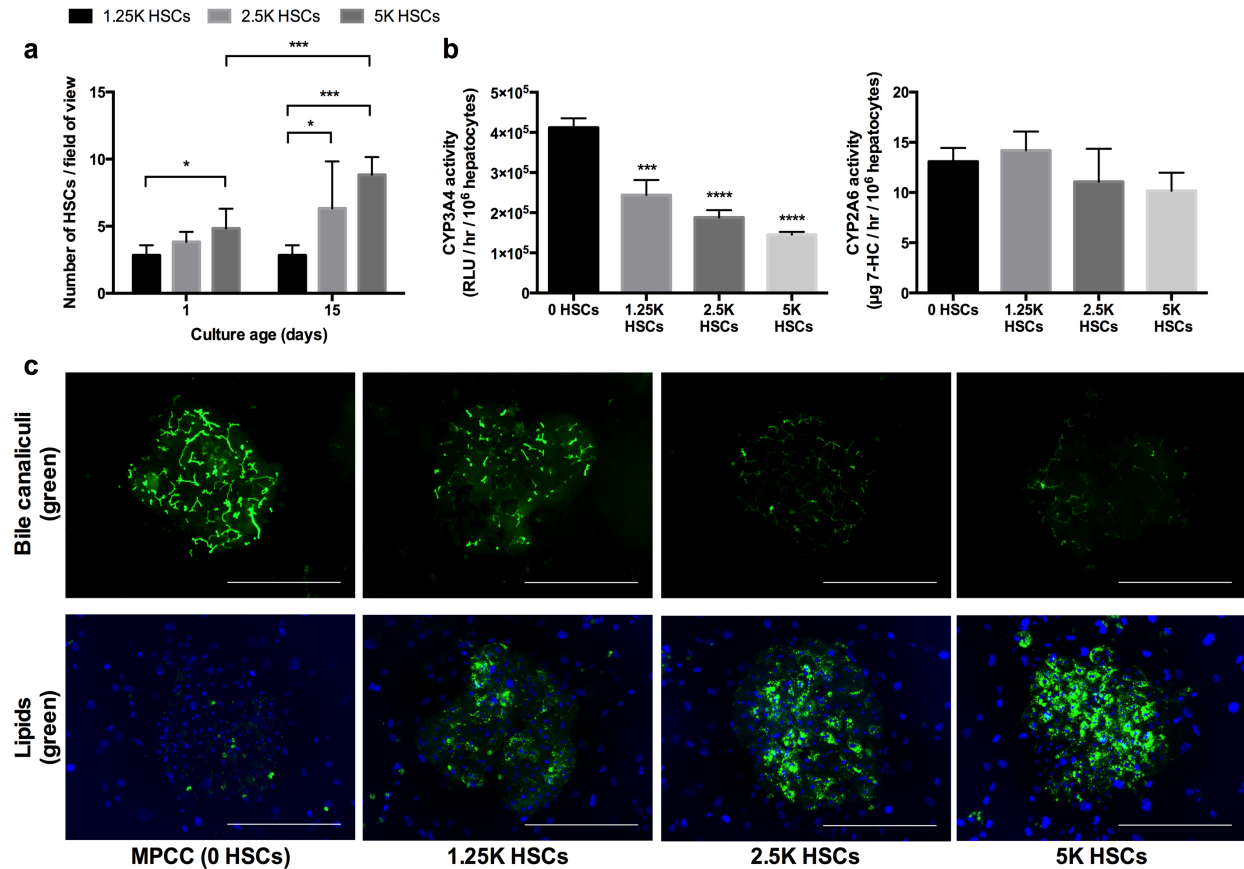

**Supplemental Figure 5. Activated HSCs cause hepatic dysfunctions and increased production of IL-6 and CRP in MPTCs (cultures were created using different PHH and HSC donors than those featured in the main figures and those featured in supplemental figure 4 above).** (a) An increase in  $\alpha$ -SMA-positive HSC numbers within MPTCs over time. (b) CYP3A4/2A6 activities in 8-day-old MPTCs and MPCCs (0 HSC). (c) **Top row:** Images of PHH islands in 16-day-old cultures showing export of (or lack thereof) fluorescent dye into the hepatic bile canaliculi. **Bottom row:** Nile red-stained PHH islands in 16-day-old cultures. Statistical significance in panel 'b' is displayed relative to MPCCs (0 HSCs) at the respective time-point. \*  $p \leq 0.05$ , \*\*\*  $p \leq 0.001$ , and \*\*\*\*  $p \leq 0.0001$ . Scale bars on images represent 400  $\mu$ m. Note: IL-6 and CRP levels over time in supernatants from MPTCs and MPCCs from these donors is featured in main Figure 7.

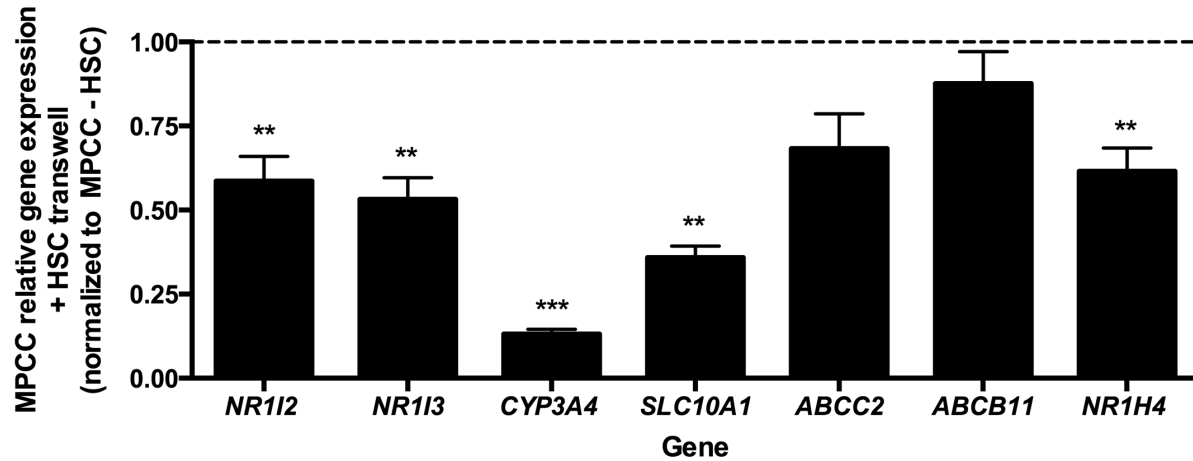

**Supplemental Figure 6. Paracrine signaling with activated HSCs in a transwell configuration leads to downregulation of gene expression in PHHs within MPCCs (cultures were created using a different HSC donor than the one featured in the main figure 6).** Transwell tri-cultures were created containing MPCCs on the bottom of the well and activated HSCs cultured in the insert placed on top within 1-2 days following the separate establishment of both MPCCs and HSC cultures. Gene expression after 2 weeks of culture in MPCCs cultured with HSC-containing inserts. Data is normalized to gene expression in MPCCs cultured with cell-free inserts. Statistical significance is displayed relative to MPCCs with cell-free transwell inserts. \*\*  $p \leq 0.01$  and \*\*\*  $p \leq 0.001$ .

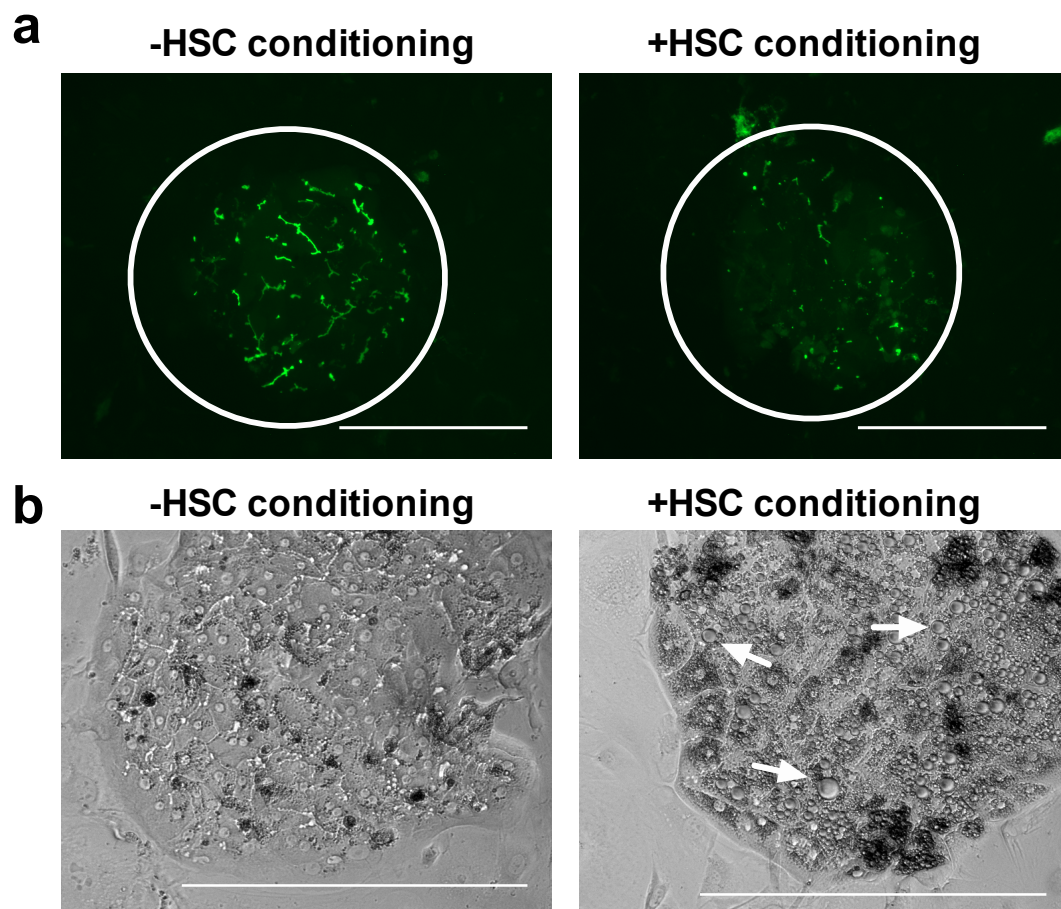

**Supplemental Figure 7. Conditioned culture medium from activated HSCs causes loss of bile canaliculi and leads to steatosis in PHHs within MPCCs.** Pure HSCs were cultured on collagen-coated tissue culture polystyrene concurrently to MPCCs in separate wells of a 24-well plate. Conditioned culture medium from the HSC cultures (initial seeding density of 5K cells per well) was filtered to remove cell contaminants and transferred to MPCCs every 2 days for ~2 weeks. **(a)** Representative images of PHH islands (denoted by white circles) in 2-week-old MPCCs (+/- treatment with HSC-conditioned medium) showing export of fluorescent dye (green) into the bile canaliculi between PHHs. **(b)** Representative phase contrast images of PHH islands in 2-week-old MPCCs (+/- treatment with HSC-conditioned medium). White arrows indicate macrovesicular steatosis in PHHs. Scale bars on images represent 400  $\mu$ m.

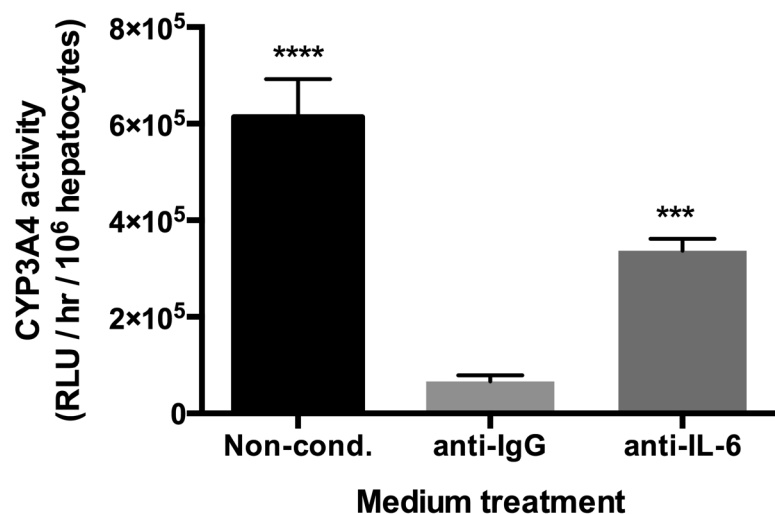

**Supplemental Figure 8. Conditioned culture medium from activated HSCs causes downregulation of CYP3A4 in PHHs within MPTCs through IL-6 signaling (cultures were created using a different HSC donor than the one featured in the main figure 8).**

Conditioned culture medium from *pure* HSC cultures (initial seeding density of 5K cells per well) was filtered to remove cell contaminants and transferred to MPCCs every 2 days. HSC-conditioned culture medium was spiked with either an anti-IL-6 neutralizing antibody or its isotype-matched anti-IgG antibody control. MPCCs on day 3 of culture were then incubated with these conditioned media for 48 h and CYP3A4 activity was assessed on day 5 of culture. Statistical significance is displayed relative to the anti-IgG control. \*\*\*  $p \leq 0.001$  and \*\*\*\*  $p \leq 0.0001$ .

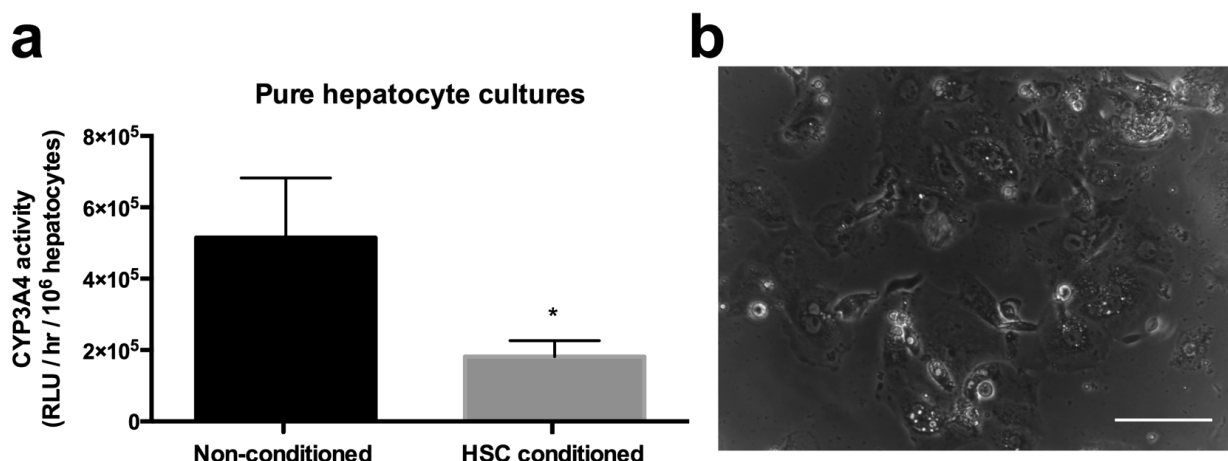

**Supplemental Figure 9. Conditioned culture medium from activated HSCs leads to the downregulation of CYP3A4 activity in pure PHH monolayers.** Pure HSCs (initial density of 5K cells per well) were cultured on collagen-coated tissue culture polystyrene concurrently to pure PHH monolayers (seeded on collagen-coated tissue culture polystyrene at 1.05M cells/cm<sup>2</sup>) in separate wells of a 24-well plate. Conditioned culture medium from the HSC cultures was filtered to remove cell contaminants and transferred to PHH monolayers every 2 days for 6 days. **(a)** CYP3A4 activity in 6-day-old PHH monolayers (+/- treatment with HSC-conditioned medium). **(b)** Representative phase contrast image of a 6-day-old PHH monolayer. Statistical significance is displayed relative to 'non-conditioned' control. \*  $p \leq 0.05$ . Scale bar on image represents 80  $\mu$ m.

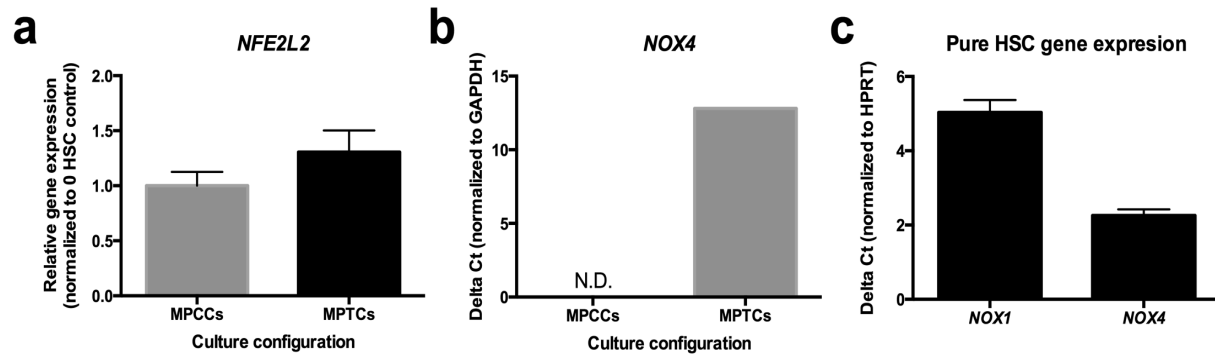

**Supplemental Figure 10. Oxidative stress-related signaling in MPCCs, MPTCs, and pure cultures of activated HSCs.** (a) *NFE2L2* (*Nrf2*) gene expression in 2-week-old MPTCs and MPCCs. (b) Delta Ct levels of *NOX4* gene expression in 2-week-old MPTCs and MPCCs (N.D. = not detected). *NOX1* was not detected in MPCCs or MPTCs (data not shown). (c) Delta Ct levels of *NOX1* and *NOX4* gene expression in 2-week-old pure HSC cultures. *GAPDH* was used as the housekeeping gene for panels 'a' and 'b', while *HPRT* was used as the housekeeping gene for panel 'c'.

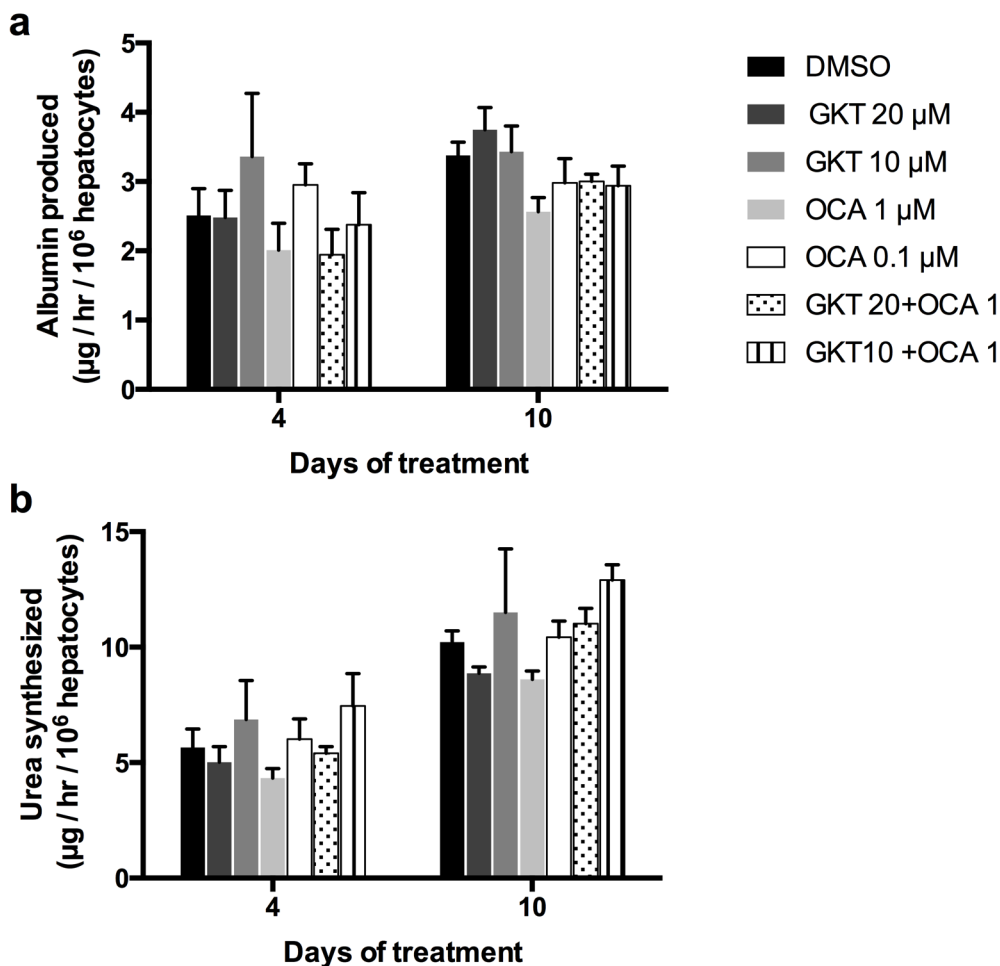

**Supplemental Figure 11. Albumin and urea secretions in MPTCs treated with drugs and their combinations.** **(a)** Albumin secretion over time in MPTCs (containing 2.5K HSCs) treated with vehicle control (DMSO), two doses of GKT, two doses of OCA, or a mixture of both GKT (20  $\mu\text{M}$  and 10  $\mu\text{M}$ ) and OCA (1  $\mu\text{M}$ ) at the indicated doses. **(b)** Dosing as in panel 'a' except urea synthesis from MPTCs is shown.

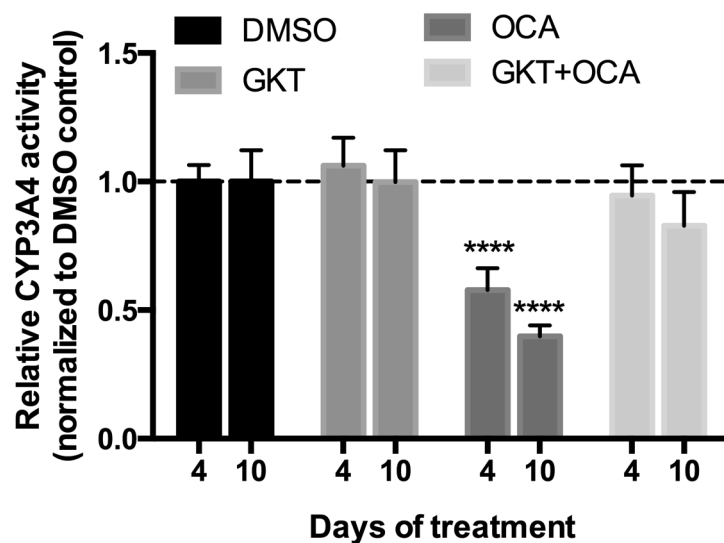

**Supplemental Figure 12. CYP3A4 activity in MPCCs treated with individual drugs, drug combination, and the vehicle control.** CYP3A4 activity over time in MPCCs treated with vehicle control (DMSO), 20  $\mu$ M GKT, 1  $\mu$ M OCA, and a mixture of both GKT (20  $\mu$ M) and OCA (1  $\mu$ M). Data is normalized to the CYP3A4 activity measured in DMSO-treated MPCCs. Statistical significance is displayed relative to the vehicle control for the respective time-point. \*\*\*\*  $p \leq 0.0001$ .



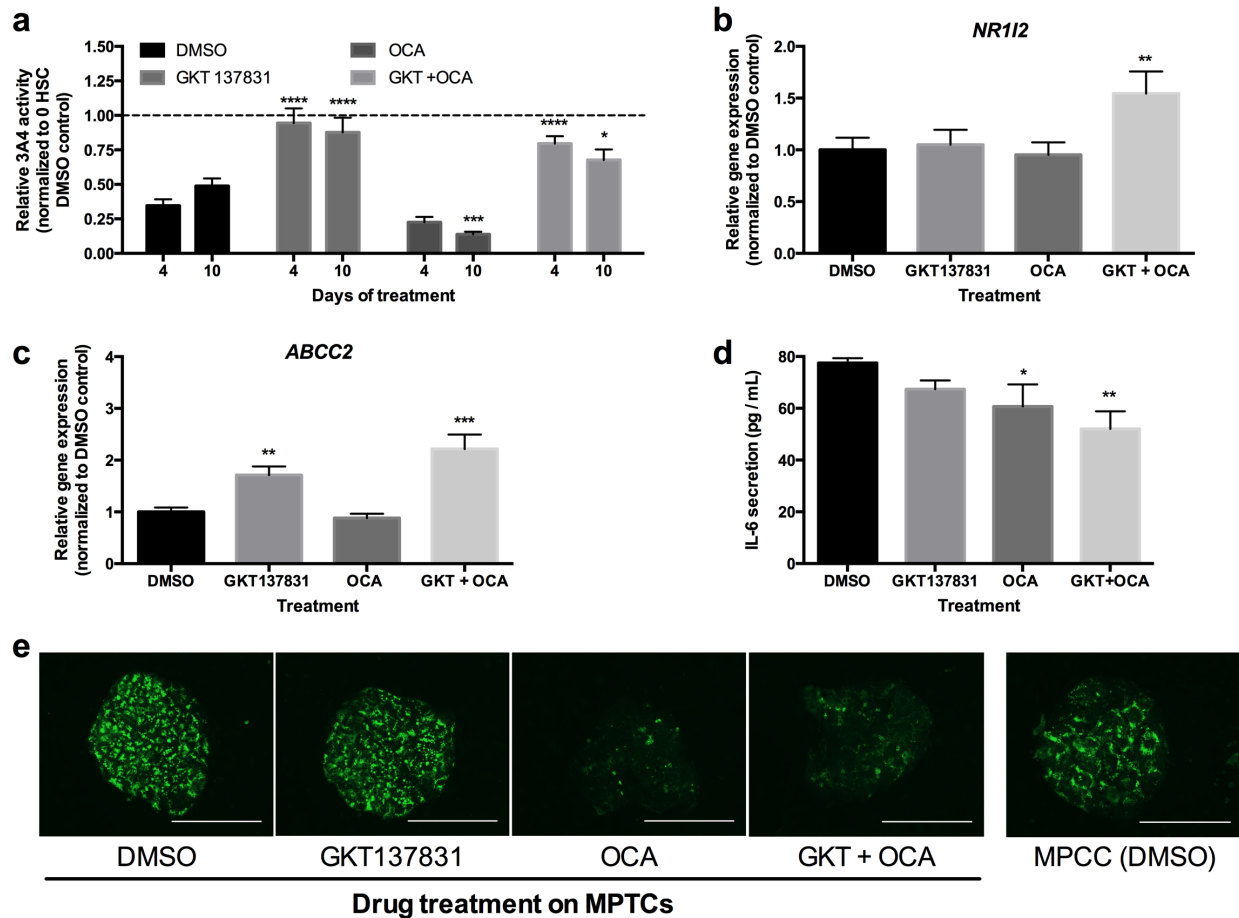

**Supplemental Figure 13. Simultaneous inhibition of NOX4 and activation of FXR rescues PHH phenotype within MPTCs (cultures were created using a different HSC donor than the one featured in the main figure 9).** (a) CYP3A4 activity in MPTCs treated for 4 d and 10 d with either DMSO, GKT137831, OCA, or a mixture of both drugs (GKT+OCA). Data is normalized to CYP3A4 activity in MPCC (0 HSC) controls (dashed line). (b) *NR1I2* (*PXR*) gene expression in drug-treated MPTCs relative to DMSO-treated MPTCs (10 d of treatment). (c) *ABCC2* (*MRP2*) gene expression in drug-treated MPTCs relative to DMSO-treated MPTCs (10 d of treatment). (d) IL-6 levels in drug-treated MPTC supernatants (6 d of treatment). (e) Neutral lipid (Nile red, green) staining of PHHs within MPTCs (10 d of drug treatment). DMSO-treated MPCC control image is shown to the far right. In all panels, statistical significance is displayed

relative to DMSO-treated MPTCs. \*  $p \leq 0.05$ , \*\*  $p \leq 0.01$ , \*\*\*  $p \leq 0.001$ , and \*\*\*\*  $p \leq 0.0001$ . Scale bars on images represent 400  $\mu\text{m}$ .
